# Chicken cGAS senses fowlpox virus infection and regulates macrophage effector functions

1 **Marisa Oliveira<sup>1</sup>, Damaris Ribeiro Rodrigues<sup>2</sup>, Vanaique Guillory<sup>3</sup>, Emmanuel Kut<sup>3</sup>,**  
2 **Efstathios S. Giotis<sup>4,5</sup>, Michael A. Skinner<sup>4</sup>, Rodrigo Guabiraba<sup>3†</sup>, Clare E Bryant<sup>2†</sup>, Brian J**  
3 **Ferguson<sup>1†\*</sup>**

4 <sup>1</sup>Department of Pathology, University of Cambridge, Tennis Court Road, Cambridge, UK

5 <sup>2</sup> Department of Veterinary Medicine, University of Cambridge, Cambridge, UK

6 <sup>3</sup> ISP, INRAE, Université de Tours, 37380, Nouzilly, France.

7 <sup>4</sup> Department of Infectious Diseases, Imperial College London, London, United Kingdom

8 <sup>5</sup> School of Life Sciences, University of Essex, Colchester, United Kingdom

9 †Co-senior authorship

10

11 **\* Correspondence:**

12 Brian J Ferguson

13 [bf234@cam.ac.uk](mailto:bf234@cam.ac.uk)

14

15 **Keywords: DNA, Fowlpox, chicken, macrophages, cGAS, STING, PRR**

16 **Abstract**

17 The anti-viral immune response is dependent on the ability of infected cells to sense foreign nucleic  
18 acids. In multiple species, the pattern recognition receptor (PRR) cyclic GMP-AMP synthase (cGAS)  
19 senses viral DNA as an essential component of the innate response. cGAS initiates a range of signalling  
20 outputs that are dependent on generation of the second messenger cGAMP that binds to the adaptor  
21 protein stimulator of interferon genes (STING). Here we show that in chicken macrophages, the  
22 cGAS/STING pathway is essential not only for the production of type-I interferons in response to  
23 intracellular DNA stimulation, but also for regulation of macrophage effector functions including the  
24 expression of MHC-II and co-stimulatory molecules. In the context of fowlpox, an avian DNA virus  
25 infection, the cGAS/STING pathway was found to be responsible for type-I interferon production and  
26 MHC-II transcription. The sensing of fowlpox virus DNA is therefore essential for mounting an anti-  
27 viral response in chicken cells and for regulation of a specific set of macrophage effector functions.

28 **Introduction**

29 The ability of virally infected cells to mount an effective innate immune response is dependent on the  
30 intracellular sensing of nucleic acids by pattern recognition receptors (Mansur et al., 2014). The  
31 PRRs that sense and respond to intracellular DNA are well characterised in a number of mammalian  
32 and non-mammalian organisms but are less studied in avian species, including chickens (Bryant et  
33 al., 2015). The PRR cyclic cAMP-GMP (cGAMP) synthase (cGAS) binds intracellular viral DNA  
34 and, via production of the second-messenger 2'3'-cGAMP, triggers a range of signalling outputs  
35 including type-I interferon (IFN-I) production, cell death and cellular senescence (Li and Chen,  
36 2018). The absence of cGAS or the adaptor protein, stimulator of interferon genes (STING), which

37 binds cGAMP, results in the susceptibility to DNA virus infection in knockout mice and impairs  
38 IFN-I production by cells infected with DNA viruses or transfected with linear double stranded DNA  
39 (Li et al., 2013). Through its ability to sense mislocalised self-DNA, the cGAS/STING signalling  
40 axis is also a potent regulator of autoinflammatory and anti-tumour immune responses (Ablasser et  
41 al., 2013a; Mullard, 2017). People with activating mutations in STING or loss-of function mutations  
42 in the 5'-3' exonuclease TREX, which removes excess cytoplasmic dsDNA, suffer from  
43 interferonopathies (Crow and Rehwinkel, 2009).

44 The ability of cGAS/STING signalling to drive multiple downstream signalling outputs is dependent  
45 on the activation of a number of distinct signalling mechanisms, some of which are better defined  
46 than others. The production of IFN-I in this context is dependent on STING recruiting and facilitating  
47 activation of TANK-binding kinase-1 (TBK1) and the transcription factor interferon regulatory  
48 factor-3 (IRF3) (Tanaka and Chen, 2012). IRF3 phosphorylation, dimerisation and translocation to  
49 the nucleus results in IFN-I transcription. The mechanism or mechanisms by which STING can  
50 promote cell death are less well described, but include inflammasome activation (Gaidt et al., 2017)  
51 and apoptosis of various cell types including myeloid and T cells (Gulen et al., 2017; Sze et al.,  
52 2013). cGAS can also activate a programme of cellular senescence in fibroblasts by sensing damaged  
53 self-DNA (Glück et al., 2017). It is not currently clear in what contexts these disparate signalling  
54 outputs are activated by cGAS/STING and to what extent they cross-talk with each other.

55 Chickens are economically important livestock birds that are infected by numerous viruses including  
56 fowlpox virus (FWPV). Fowlpox is a virus from the *poxviridae* family that replicates its double  
57 stranded DNA genome in the cytoplasm of infected cells. The infection is characterised by  
58 proliferative lesions in the skin that progress to thick scabs (cutaneous form) and by lesions in the  
59 upper GI and respiratory tracts (diphtheritic form) (Giotis and Skinner, 2019). Transmitted  
60 mechanically by biting insects, it causes significant losses to all forms of poultry production systems  
61 (from backyard, through extensive to intensive commercial flocks). It is particularly challenging in  
62 tropical climates where control of biting insects is difficult. FWPV is also used as a live recombinant  
63 vaccine vector in avian and mammalian species (Lousberg et al., 2010). Like other poxviruses the  
64 cytoplasmic replication cycle of FWPV exposes large amounts of foreign DNA to intracellular DNA  
65 sensing PRRs, making cGAS a likely candidate for sensing FWPV infection and making FWPV a  
66 potentially useful tool for delineating nucleic acid sensing mechanisms in avian systems. The  
67 mechanisms by which FWPV is sensed by PRRs during infection have not, however, been described.

68 In this study we show the existence of a cGAS/STING pathway in chicken macrophages and  
69 determine its downstream signalling outputs. Using cGAS and STING CRISPR/Cas9 knockout  
70 HD11 cells and pharmacological inhibitors of STING and TBK1 in primary macrophages, we show  
71 that the activation of cGAS by intracellular DNA drives a IFN-I response and that this response can  
72 be enhanced by priming cells with IFN $\alpha$ . As well as driving IFN-I production, we show that  
73 cGAS/STING signalling in macrophages can enhance transcription of specific immune recognition  
74 molecules including genes encoding the class II major histocompatibility complex (MHC-II) and co-  
75 stimulatory proteins, but without altering phagocytosis. Using FWPV mutants that are deficient in  
76 specific immunomodulators we are able to overcome the immunosuppression of wild type FWPV  
77 and show that this virus is sensed by cGAS, resulting in IFN-I and MHC-II transcription. These data  
78 show that the cGAS/STING/TBK1 pathway senses viral DNA in chicken macrophages and that this  
79 pathway regulates not only the antiviral interferon response but also modulates specific components  
80 of macrophage effector function machinery.

81

## 82 **Materials and Methods**

### 83 **Reagents**

84 Calf Thymus (CT) DNA (Sigma), Herring Testes (HT) DNA (Sigma), polyinosinic-polycytidylic  
85 acid (poly(I:C), Invivogen), 2'3'-cGAMP (Invivogen) and chicken interferon alpha (Yeast-derived  
86 Recombinant Protein, Kingfisher Biotech, Inc) were diluted in nuclease-free water (Ambion,  
87 ThermoFisher). H-151 and BX795 (Invivogen) were diluted in DMSO, following the manufacturer's  
88 protocols.

### 89 **Cell Culture**

90 HD11 cells, an avian myelocytomatosis virus (MC29)-transformed chicken macrophage-like cell line  
91 (Beug et al., 1979), were incubated at 37°C, 5% CO<sub>2</sub>. They were grown in RPMI (Sigma-Aldrich,  
92 Germany) complemented with 2.5% volume per volume (v/v) heat-inactivated foetal bovine serum  
93 (FBS; Sera Laboratories International Ltd), 2.5% volume per volume (v/v) chicken serum (New  
94 Zealand origin, Gibco, Thermo Fisher Scientific), 10% Tryptose Phosphate Broth solution (Gibco,  
95 Thermo Fisher Scientific), 2 mM L-glutamine (Gibco, Thermo Fisher Scientific), 50 µg/mL of  
96 penicillin/streptomycin (P/S; Gibco, Thermo Fisher Scientific).

97 Chicken embryonic fibroblasts (CEFs) (Pirbright Institute, Woking, UK) were incubated at 37°C, 5%  
98 CO<sub>2</sub> and were grown in Dulbecco's Modified Eagle Medium (DMEM) -F12 with Glutamax (Gibco),  
99 5% v/v FBS, and 50 µg/mL P/S.

### 100 **Knock-out HD11 cell line generation by CRISPR-Cas9**

#### 101 **CRISPR guide design**

102 According to the *MB21D1* (cGAS) and *TMEM137* (STING) sequences obtained from the Ensembl  
103 database (release 94), single guide (sg)RNA sequences (Table 1) were designed targeting the  
104 catalytic domain (residues 11-13 and 109) and start of the open reading frame, for cGAS and STING,  
105 respectively.

#### 106 **Knock-out cell lines generation using CRISPR-Cas9**

107 Genome editing of HD11 was performed using ribonucleoprotein (RNP) delivery. tracrRNA was  
108 mixed with the target specific sgRNA (Table 1), followed by an incubation at 95°C. To form the  
109 RNP complex, the tracrRNA/sgRNA mix was incubated with the Cas9 protein (IDT, Leuven,  
110 Belgium) and electroporation enhancer at 21°C.

111 To generate knockout cells, 1x10<sup>6</sup> cells per guide were electroporated with the corresponding RNP  
112 complex using Lonza Electroporation Kit V (Lonza). After 48 h, the cells were expanded for future  
113 experiments and their DNA were extracted using the PureLink Genomic DNA Kit (Thermo  
114 Scientific, Waltham, MA, USA). The knockout efficiency was evaluated by genotyping the  
115 polyclonal cell populations using MiSeq (Illumina) according to a published method (Schmidt et al.,  
116 2016). The primers used for the sequencing are listed Table 2.

117 The successfully edited populations (using guides cGAS sg3 and STING sg1) were diluted to a  
118 concentration of 0.5 cell/well and seeded in 96-well plates. Individual clones were sequenced by  
119 MiSeq and the confirmed knockout clones were expanded for experiments.

## 120 **Primary macrophages**

121 Chicken bone marrow derived macrophages (BMDM) were generated as previously described (Garrido  
122 et al., 2018). Briefly, femurs and tibias of 4 week-old immunologically mature White Leghorn (PA12  
123 line) outbred chickens were removed, both ends of the bones were cut and the bone marrow was flushed  
124 with RPMI supplemented with P/S. Cells were then washed and re-suspended in RPMI, loaded onto  
125 an equal volume of Histopaque-1077 (Sigma-Aldrich, Germany), and centrifuged at 400 g for 20 min.  
126 Cells at the interface were collected and washed twice in RPMI. Purified cells were seeded at  
127  $1 \times 10^6$  cells/ml in sterile 60 mm bacteriological petri dishes in RPMI supplemented with 10% FBS,  
128 25 mM HEPES, 2 mM L-glutamine, P/S and 25 ng/ml recombinant chicken colony stimulating factor  
129 1 (CSF-1) (Kingfisher Biotech, Inc) at 41 °C and 5% CO<sub>2</sub>. Half of the medium was replaced with fresh  
130 medium containing CSF-1 at day 3. At day 6, adherent cells were harvested and cultured in RPMI  
131 supplemented with 10% FBS, 25 mM HEPES, 2 mM L-glutamine, and P/S prior to stimulation.

## 132 **Stimulation Assays**

133 HD11 (WT, cGAS and STING knockouts) were seeded in 12-well plates at a density of  $3 \times 10^5$   
134 cells/well. In the following day, the cells were transfected using TransIT-LT1 (Mirus Bio, USA) with  
135 HT-DNA (1, 2 or 5 µg/mL), CT-DNA (1, 2 or 5 µg/mL) or Poly(I:C) (1 µg/mL), and harvested 6 h or  
136 16 h post-transfection. In the priming assays, IFN $\alpha$  (200 ng/mL) was added 16 h hours prior to  
137 transfection. 2'3' cGAMP was added at a concentration of 2.5 µg/mL and cells were harvested 6 h  
138 post-treatment.

139 BMDM were seeded in 6-well plates at  $8 \times 10^5$  cells/ml. In the following day, cells were transfected  
140 using TransIT-LT1 with HT-DNA (2 µg/mL), CT-DNA (2 µg/mL) or Poly(I:C) (1 µg/mL), and  
141 harvested 6 h post-transfection. In the priming assays, IFN $\alpha$  (50 ng/ml) was added 16 h prior  
142 transfection to the cells supernatants. 2'3' cGAMP was added to cells supernatants at the  
143 concentration of 10 µg/mL and the cells were harvested 6 h post-treatment.

## 144 **Chicken IFN-I bioassay**

145 The presence of IFN-I in supernatants of stimulated BMDM was measured indirectly using a  
146 luciferase-based Mx-reporter bioassay (Schwarz et al., 2004). Briefly, cells from the quail fibroblast  
147 cell line CEC32 carrying the luciferase gene under the control of chicken Mx promoter (kindly  
148 provided by Prof. Peter Stäheli, University of Freiburg, Germany) were seeded at  $2.5 \times 10^5$  cells/well  
149 in 24-well plates and incubated at 41 °C under 5% CO<sub>2</sub>. The next day, cells were incubated for 6 h  
150 with the diluted supernatants (1/10 of total volume). Medium was removed and cells were washed  
151 twice with PBS. Cells were lysed using the Cell Culture Lysis Reagent (Promega, USA), according  
152 to the manufacturer's instructions, and luciferase activity was measured using the Luciferase assay  
153 reagent (Promega, USA) and a GloMax-Multi Detection System (Promega, USA).

## 154 **Cell viability**

155 BMDM viability following different stimuli was assessed using the fluorescent DNA intercalator 7-  
156 aminoactinomycin D (7-AAD, BD Biosciences, USA). Briefly, following stimulations, supernatants  
157 were discarded and the cells were harvested and washed in PBS. Cells were stained according to the  
158 manufacturer's protocol and the viability was analyzed by flow cytometry (BD FACS Calibur). Data  
159 were expressed as the percentage of 7AAD positive cells over total acquired events (50,000 cells).

## 160 RNA Extraction

161 Cells were lysed by overlaying with 250  $\mu$ L of lysis buffer containing 4 M guanidine thiocyanate, 25  
162 mM Tris pH 7, and 143 mM 2-mercaptoethanol. As a second step, 250  $\mu$ L of ethanol was added, and  
163 the solution was transferred to a silica column (Epoch Life Science, Inc., Sugar Land, TX, USA) and  
164 centrifuged; all centrifugation steps were performed for 90 seconds at 16600 g. The bound RNA was  
165 washed by centrifugation with 500  $\mu$ L of buffer containing 1 M guanidine thiocyanate, 25 mM Tris  
166 pH 7, and 10% ethanol, followed by a double washing step with 500  $\mu$ L of wash buffer 2 (25 mM  
167 Tris pH 7 and 70% (v/v) ethanol). RNA was eluted by centrifugation in 30  $\mu$ L of nuclease-free water  
168 and the concentration was measured using a NanoDrop 2000 Spectrophotometer (Thermo Scientific,  
169 Waltham, MA, USA).

## 170 cDNA and qPCR

171 Using 500 ng of RNA extracted from HD11 cells, cDNA was produced using SuperScript III reverse  
172 transcriptase, following the manufacture's protocol (Thermo Scientific, Waltham, MA, USA).  
173 Samples were diluted in nuclease-free water in a 1:2.5 ratio. 1  $\mu$ L of the diluted product was used for  
174 quantitative PCR (qPCR) in a final volume of 10  $\mu$ L. qPCR was performed using SybrGreen Hi-Rox  
175 (PCR Biosystems Inc.) using primers described in Table 3. Fold change in mRNA expression was  
176 calculated by relative quantification using hypoxanthine phosphoribosyltransferase (HPRT) as  
177 endogenous control.

178 Total RNA (up to 1  $\mu$ g per reaction) from BMDM was reverse transcribed with iScript cDNA  
179 synthesis kit (Bio-Rad, USA). Quantitative PCR was performed using 1  $\mu$ L of cDNA, 5  $\mu$ L of iQ  
180 SYBR Green Supermix (Bio-Rad, USA), 0.25  $\mu$ L of each primer pair and 3.5  $\mu$ L of nuclease-free  
181 water in a total reaction volume of 10  $\mu$ L. Fold-increase in gene expression was calculated by relative  
182 quantification using HPRT and Glyceraldehyde 3-phosphate dehydrogenase (GAPDH) as  
183 endogenous controls.

## 184 Phagocytosis assay by flow cytometry

185 HD11 WT cells were seeded at a confluence of  $3 \times 10^5$  cells/ml in 12-well plates. The cells were  
186 primed with IFN $\alpha$  for 16h and then with transfected exogenous DNA (HT- and CT-DNA – 2  $\mu$ g/mL)  
187 or treated with 2'3'cGAMP (5  $\mu$ g/mL) for 6 h. After this, the cells were incubated with Zymosan  
188 coated beads conjugated with FITC at a ratio of 30 beads to 1 cell for all conditions for 40 min at  
189 37 °C. The cells were wash two times in PBS and fixed in suspension using the solution (missing ref;  
190 BD Biosciences) with 4% PFA. Cell populations were counted by analysis on a CytoFLEX  
191 cytometer.

## 192 Fowlpox virus growth and titration

193 Fowlpox WT (FP9) and mutants (FPV012 (Laidlaw et al., 2013) and FPV184 (Giotis & Skinner,  
194 unpublished)) were propagated in primary chicken embryonic fibroblasts (CEFs) and grown in  
195 DMEM-F12 (Thermo Fisher Scientific, Waltham, MA, USA) containing 1% FBS and 5% P/S, and  
196 harvested 5 days later. 10-fold dilutions of cell supernatants were prepared in serum-free DMEM-F12  
197 and used to inoculate confluent monolayers of CEFs for 1.5 h at 37°C. Cells were then overlaid with  
198 2xMEM:CMC (1/1 ratio). The foci were counted 7 days later after staining with Toluidine Blue.

## 199 Fowlpox virus infection



200 HD11 cells were seeded in 12-well plates in the day prior infection. Fowlpox viruses were diluted in  
201 serum-free DMEM-F12 at a multiplicity of infection (MOI) of 3 and added in the cells (1 ml per  
202 well). Infected cells and supernatants were collected from infections at 8h and 24h post-infection.

### 203 **Statistical Analysis**

204 Prism 7 (GraphPad) was used to generate graphs and perform statistical analysis. Data were analyzed  
205 using an unpaired t test with Welch's correction unless stated otherwise. Data with  $P < 0.05$  was  
206 considered significant and 2-tailed P-value were calculated and presented as:  $<0.0001$  - \*\*\*\*,  
207  $>0.0001$  - \*\*\*,  $>0.001$  - \*\*,  $>0.01$  - \*. Each experiment has at least two biological replicates unless  
208 stated.

### 209 **Results**

#### 210 **Intracellular DNA activates a IFN-I response in chicken macrophages**

211 In order to assess the ability of chicken macrophages to sense and respond to intracellular DNA we  
212 used a combination of the monocytic cell line HD11 and primary bone marrow derived macrophages  
213 (BMDM). Transfection of CT DNA, increasing doses of HT-DNA or the RNA analogue poly(I:C)  
214 into HD11 cells resulted in transcription of chicken interferon- $\beta$  (IFN $\beta$ ) and the interferon stimulated  
215 gene (ISG) ISG12.2, an orthologue of mammalian IFI6 (Figure 1A). A dose-dependent response to  
216 DNA was observed. Transfection of DNA into primary BMDMs also resulted in IFN $\beta$  and ISG12.2  
217 transcription (Figure 1B) and IFN-I secretion as measured by a bioassay (Figure 1C), indicating that  
218 this response is present in both primary macrophages and the transformed monocytic HD11 cell line.

219 Since in mammalian systems STING is recognised as an interferon stimulated gene (ISG) (Ma et al.,  
220 2015), we sought to understand the effect of IFN-I priming of macrophages on the response to  
221 intracellular DNA. Pre-treatment of HD11 or BMDM with chIFN $\alpha$  resulted in an enhancement of  
222 IFN $\beta$  transcription following DNA stimulation and confirmed ISG12.2 as an ISG (Figure 1D). This  
223 signalling enhancement might be explained by increased transcription of STING and/or IRF7  
224 following IFN $\alpha$  treatment (Supplementary Figure 1). Across all HD11 and BMDM DNA  
225 stimulations we found that there was little observable or measurable cell death (Figure 1E),  
226 indicating that, in chicken macrophages, cell death is not a specific output of STING signalling.

#### 227 **Intracellular DNA stimulates transcription of MHC-II and co-stimulatory molecules**

228 The sensing of both intracellular and extracellular pathogens activates macrophages, causing up-  
229 regulation or enhancement of effector functions designed to combat infection. We hypothesised that  
230 DNA transfection, mimicking the presence of intracellular infection, might result in direct effects on  
231 the molecules that contribute to T cell stimulation. There are two chicken MHC-II beta chain genes,  
232 BLB1 and BLB2, both of which were transcriptionally upregulated by DNA stimulation in chicken  
233 BMDMs (Figure 2A). In HD11 cells, BLB1 transcription was upregulated by DNA stimulation,  
234 while BLB2 transcription was upregulated only by IFN $\alpha$  pre-treatment (not shown), highlighting  
235 possible differences between primary and transformed cells in this specific context (Figure 2B).  
236 CD86 and CD40 are key co-stimulatory molecules in T cell activation. In BMDM CD86 and CD40  
237 transcription was upregulated in response to DNA stimulation (Figure 2A). There was, however, no  
238 measurable impact of DNA stimulation on phagocytosis as measured by bead-uptake assays in HD11  
239 cells (Figure 2C). As such, key molecules involved in T cell activation by macrophages are regulated  
240 by DNA stimulation, but not all macrophage effector functions are equally enhanced by this signal.

## 241 **STING and TBK1 contribute to DNA-driven transcriptional responses in chicken BMDMs**

242 In order to dissect the signalling pathway downstream of intracellular DNA sensing, we first used the  
243 ligand 2'3'-cGAMP, the enzymatic product of cGAS that directly binds and activates STING  
244 (Ablasser et al., 2013b). Treatment of BMDMs or HD11 cells with 2'3'-cGAMP led to increased  
245 transcription levels of IFN $\beta$ , ISG12.2, BLB1, BLB2, CD86 and CD40 (Figure 3A,B). This response,  
246 and the response to DNA stimulation, could be reduced by small molecule inhibitors of STING  
247 (H151) and the kinase TBK1 (BX795), indicating the existence of a STING and TBK1-dependent  
248 signalling pathway in chicken macrophages and evidencing the cross-species utility of these two  
249 pharmacological inhibitors (Figure 3D). As with DNA stimulation, there was no measurable impact  
250 of cGAMP treatment on phagocytosis in HD11 cells (Figure 3E).

## 251 **cGAS is essential for intracellular DNA-dependent IFN-I and MHC-II transcription in HD11** 252 **cells**

253 To address the possibility that cGAS is a principle PRR responsible for sensing intracellular DNA in  
254 chicken macrophages, we generated HD11 knockout cell lines using CRISPR/Cas9 genome editing.  
255 To do this we analysed the annotated cGAS sequence in the current release of the *Gallus gallus*  
256 genome and designed gRNA sequences targeting regions of the gene which exhibited high  
257 conservation across multiple orthologues. By sequencing single cell clones we generated multiple  
258 cGAS knockout cell lines with two different gRNAs. By sequencing across the gRNA PAM target  
259 sites, we characterised indels to confirm the knockout status in these clones (eg Figure 4A).  
260 Stimulation of multiple cGAS knockout HD11 clones, each with a different indel, with DNA resulted  
261 in an abrogation of IFN-I and ISG transcription indicating that cGAS is a key PRR for sensing  
262 intracellular DNA in chicken macrophages (Figure 4B and Supplementary Figure 2). cGAS knockout  
263 also abrogated the upregulation of DNA-driven BLB1 stimulation, indicating the cGAS-dependent  
264 signalling is responsible for regulation of MHC class II transcription in this context (Figure 4B).  
265 These data were independent of IFN $\alpha$  pre-treatment, which enhanced IFN-I and BLB1 transcription  
266 in WT DNA-stimulated cells, but did not affect cGAS KO cells (Figure 4C). Consistent with the  
267 mammalian cGAS mechanism, stimulation of WT or cGAS KO cells with 2'3'-cGAMP resulted in  
268 robust IFN-I transcription, indicating IFN-I production by direct STING ligation was not affected by  
269 cGAS KO (Figure 4D). These data confirm the intracellular DNA PRR function of cGAS in chicken  
270 macrophages.

## 271 **STING is essential for intracellular DNA-dependent IFN-I transcription in HD11 cells**

272 In parallel, using the same methodology, we generated multiple STING knockout HD11 cell lines  
273 (Figure 5A). Stimulation of these cells with DNA phenocopied the cGAS knockout lines, confirming  
274 the function of chicken STING downstream of cGAS in the intracellular DNA sensing pathway  
275 (Figure 5B, Supplementary Figure 3). These data are consistent with the presence of a cGAS/STING  
276 pathway in HD11 cells and, in concert with the data using H151 in BMDMs, indicate the function of  
277 STING as a critical adaptor protein for intracellular DNA sensing in chicken macrophages.

278

## 279 **Fowlpox triggers a cGAS / STING dependent DNA sensing pathway in HD11 cells**

280 FWPV replication exposes large quantities of DNA to the cytoplasm of infected cells making it a  
281 prime target for intracellular DNA sensing PRRs. Despite this, using the wild-type vaccine strain FP9  
282 we, and others (Giotis and Skinner, 2019; Laidlaw et al., 2013), observe little or no IFN-I

283 transcription in infected cells, and indeed a downregulation of IFN and MHC transcription (Figure  
284 6A). The lack of IFN-I response in poxvirus infected cells is likely due to the presence of numerous  
285 virally-encoded suppressors of PRR signalling and IFN-I production (Laidlaw et al., 2013; Smith et  
286 al., 2013), hence deletion of specific innate immunomodulators from the viral genome can result in a  
287 virus that stimulates host IFN-I signalling. We made use of FWPV mutants FPV012 and FPV184  
288 ((Laidlaw et al., 2013, Giotis & Skinner, unpublished), each deficient in single genes that are  
289 proposed immunomodulators, and both of which induce IFN-I production from infected cells  
290 (Laidlaw et al., 2013), including HD11 cells (Figure 6B). In the absence of cGAS or STING the  
291 transcription of IFN-I, ISG12.2, BLB1 and CD40 by FPV184 or FPV012 was significantly lower at  
292 24h post infection (Figure 6B), despite robust infection of HD11 cells by all three virus strains  
293 (Figure 6C), indicating that FWPV is sensed in infected cells by the DNA sensing PRR cGAS and  
294 that the cGAS/STING pathway is responsible for FWPV-induced IFN-I production and MHC-II  
295 transcription.

## 296 Discussion

297 The ability of innate immune cells to detect virus infection is dependent on a set of PRRs that directly  
298 bind viral nucleic acids. Macrophages act in this context as tissue-resident sentinel sensors of  
299 infection that express a broad repertoire of PRRs and mount a rapid and robust innate immune  
300 response to viruses and other pathogens. Indeed intracellular DNA sensing was first described in  
301 macrophages (Stetson and Medzhitov, 2006). As well as interferon and cytokine production,  
302 activated macrophages use effector functions for pathogen clearance and for activation of adaptive  
303 immunity. In mammalian systems the signalling outputs downstream of intracellular DNA detection  
304 in macrophages include IRF-dependent IFN and cytokine production and cell death driven by the  
305 AIM2 inflammasome. In chicken macrophages, which lack AIM2, we find that intracellular DNA  
306 sensing produces IFN but doesn't result in measurable cell death, rather it upregulates a specific set  
307 of antigen presentation machinery including the MHC-II gene BLB1 and co-stimulatory molecules,  
308 providing a direct link between anti-viral innate sensing and the initiation of adaptive immunity.

309 During DNA virus infection, the cGAS/STING-dependent signalling pathway is triggered by viral  
310 DNA, resulting in type-I interferon production via activation of TBK1 and the IRF family of  
311 transcription factors. Although well defined in mammalian systems, the function of chicken cGAS  
312 and STING has only more recently been identified (Gao et al., 2018; Vitak et al., 2016). FWPV is an  
313 avian poxvirus that causes skin lesions and respiratory infections and can infect multiple cell types  
314 including macrophages (Williams et al., 2010). Here we show that the cGAS/STING pathway in  
315 chicken macrophages can sense FWPV infection and is responsible for the IFN-I response as well as  
316 for upregulation of BLB1.

317 In order to escape detection and evade host anti-viral responses, poxviruses like FWPV encode a  
318 broad range of immunomodulatory proteins that target PRR signalling pathways resulting in these  
319 viruses being able to effectively inhibit IFN production from infected cells. These immune evasion  
320 mechanisms mask the signalling outputs of PRR signalling during infection with wild type  
321 poxviruses. To overcome this issue, we used two mutant FWPVs with deletions in individual genes  
322 that block IFN-I production during infection. Infection of cells with FPV184 and FPV012 (Giotis et  
323 al., 2016) resulted in interferon and ISG transcription, which was lost in cGAS and STING knockout  
324 lines. FWPV DNA is therefore sensed by the cGAS/STING pathway and the downstream signalling  
325 response leading to IFN-I production is effectively blocked by the wild type virus.



326 Birds occupy the same habitats as mammals, have comparable ranges of life span and body mass, and  
327 confront similar pathogen challenges, yet birds have a different repertoire of organs, cells, molecules  
328 and genes of the immune system compared to mammals (Kaiser, 2010). It is increasingly evident that  
329 the immune system of avian species is rather different from those of model mammalian species.  
330 Untested extrapolation from mammalian systems cannot provide the quality of knowledge that is  
331 required for understanding host-pathogen relationships in birds. Here we find that the signalling  
332 downstream of chicken cGAS leading to IFN-I transcription is similar to that found in mammalian  
333 systems. The presence of orthologues of STING and TBK1 in the chicken genome and their  
334 functional inhibition by small molecule compounds (H151 and BX795) is indicative of mechanistic  
335 signalling pathway conservation. The chicken genome also contains an orthologue of IRF3, which is  
336 the main transcription factor downstream of STING/TBK1 activation, although chicken IRF7 (as this  
337 gene is annotated) is not equivalent to mammalian IRF3 or IRF7 and may be considered more as a  
338 hybrid these two genes (Grant et al., 1995). It is likely that chicken IRF7 and TBK1 are recruited by  
339 STING following 2'3'-cGAMP ligation and that subsequent phosphorylation, dimerisation and  
340 nuclear translocation of IRF7 leads to DNA-induced IFN-I transcription (Cheng et al., 2019; Gao et  
341 al., 2018). Recent evidence has implicated chicken cGAS and STING in avian antiviral defence, in  
342 particular against Marek's Disease Virus (MDV) and chicken adenovirus 4 (Li et al., 2019; Wang et  
343 al., 2020) in fibroblasts. Using CRISPR/Cas9 technology to knockout STING and cGAS in a  
344 transformed monocytic cell line (HD11) and complementing these data in primary macrophages with  
345 pharmacological inhibitors we have been able to show this cGAS/STING/TBK1 pathway is active in  
346 chicken macrophages. The use of primary cells in this context is important as transformation or  
347 immortalisation can significantly alter PRR pathways so as to obscure physiological signalling  
348 mechanisms.

349 IFN-I is one of the most effective anti-viral innate immune mediators. Secretion and subsequent ISG  
350 transcription induced by autocrine and paracrine IFN receptor signalling sets an anti-  
351 viral/inflammatory state in infected and bystander cells. As an example, chicken IFN $\beta$  was shown to  
352 be an autocrine/paracrine pro-inflammatory mediator in chicken macrophages (Garrido et al., 2018),  
353 with direct effects in macrophage effector functions. Nucleic acid sensing PRRs therefore provide a  
354 rapid and potent innate response helping to combat infection and reduce viral spread in infected  
355 tissues. At the same time, innate immune responses can initiate and amplify adaptive immune  
356 responses for example, by regulating functions of antigen presenting cells (APCs), promoting cross-  
357 priming and stimulating antibody production (Desmet and Ishii, 2012; Loré et al., 2003; Schulz et al.,  
358 2005). In both mammals and birds, macrophages are key regulators of adaptive immunity as principle  
359 APCs. By processing and presenting antigen to T and B cells, macrophages directly trigger adaptive  
360 responses. The discovery that cGAS/STING signalling can directly regulate the transcription of  
361 MHC genes in macrophages provides further evidence linking PRR signalling with the activation of  
362 adaptive immunity during infection. It remains to be explored exactly how the transcription of BLB1  
363 and BLB2 is regulated by cGAS/STING signalling. In tissues, macrophages survey the local  
364 environment for infection and damage. In this context, macrophage effector functions may be  
365 modulated by the presence of innate immune mediators in the tissue. The priming effect of IFN $\alpha$  as  
366 an enhancer of macrophage DNA sensing, by upregulating STING expression, suggests a possible  
367 mechanism of bystander surveillance. Tissue resident macrophages may respond to signals, including  
368 IFN-I and cGAMP, secreted from virally infected stromal cells by enhancing specific effector  
369 functions appropriate to defend against viral infection in the tissue (Ablasser et al., 2013c; Schadt et  
370 al., 2019).

371 Our data adds to the list of chicken cGAS/STING functions in sensing of avian DNA viruses such as  
372 MDV and Adenovirus 4 that replicate in the nucleus or FWPV that replicates in the cytoplasm, and in

373 the regulation of macrophage effector functions. The ability of this pathway to sense a broad range of  
374 DNA viruses that replicate in different compartments in avian innate immune cells indicates that this  
375 pathway is a primary DNA sensing mechanism for DNA viruses in chickens.

376

## 377 **Figure Legends**

378 **Figure 1. Intracellular DNA activates an IFN-I response in chicken macrophages.** (A) HD11  
379 cells were transfected with HT-DNA (1, 2 and 5  $\mu\text{g}/\text{mL}$ ), CT-DNA (5  $\mu\text{g}/\text{mL}$ ) or Poly(I:C) and  
380 transcription of IFNB and ISG12.2 measured by qRT-PCR 6 h later. (B) Chicken BMDM were  
381 transfected with HT- DNA, CT-DNA (2  $\mu\text{g}/\text{mL}$ ) or Poly(I:C) (1  $\mu\text{g}/\text{mL}$ ) and transcription of IFNB  
382 and ISG12.2 measured by qRT-PCR 6 h later. (C) Resting BMDMs or BMDMs primed with IFN $\alpha$   
383 for 6 h were transfected with HT- DNA, CT-DNA (2  $\mu\text{g}/\text{mL}$ ) or Poly(I:C) (1  $\mu\text{g}/\text{mL}$ ) and interferon  
384 activity in the supernatants was measured after 24 h using a bioassay. (D) HD11 or BMDM were  
385 primed with IFN $\alpha$  for 6h, transfected with HT-DNA, CT-DNA, or Poly(I:C) and transcription of  
386 IFNB and ISG12.2 measured by qRT-PCR 6 h later. (E) BMDM were primed with IFN $\alpha$  for 6h,  
387 transfected with HT-DNA, CT-DNA, or Poly(I:C) and cell viability measured by 7AAD staining 24  
388 h later. \*:  $p < 0.05$ , \*\*:  $p < 0.01$ , \*\*\*:  $p < 0.001$ ; \*\*\*\*:  $p < 0.0001$ ; ns: no significant difference.

389 **Figure 2. Intracellular DNA stimulates transcription of MHC-II and co-stimulatory molecules.**  
390 (A) BMDMs or (B) HD11 cells were transfected with HT-DNA, CT-DNA, or Poly(I:C) and  
391 transcription of BLB1, BLB2, CD40 and CD86 measured by qRT-PCR 6 h later. (C) HD11 cells  
392 were stimulated with HT-DNA, CT-DNA, or Poly(I:C) and 6 h later phagocytosis was monitored by  
393 FITC-conjugated, zymosan coated bead uptake. Histograms of non-treated versus treated cells (left  
394 panels) and respective percentages of FITC positive cells for each treatment tested (right panel) are  
395 presented. \*:  $p < 0.05$ , \*\*:  $p < 0.01$ , \*\*\*:  $p < 0.001$ ; \*\*\*\*:  $p < 0.0001$ ; ns: no significant difference.

396 **Figure 3. STING and TBK1 contribute to DNA-driven transcriptional responses in chicken**  
397 **BMDMs.** (A) HD11 and (B) BMDM cells were treated with 2'3'cGAMP (10  $\mu\text{g}/\text{mL}$ ) and qRT-PCR  
398 carried out 6 h later for the indicated genes. (C) BMDM were treated with the STING inhibitor H-  
399 151 (10  $\mu\text{M}$ ) or TBK1 inhibitor BX795 (1  $\mu\text{M}$ ) for 1 h before transfection with HT-DNA and CT-  
400 DNA. 6 h later RNA was extracted and qRT-PCR carried out for the indicated genes. (D) BMDM  
401 were treated with the STING inhibitor H-151 (10  $\mu\text{M}$ ) or TBK1 inhibitor BX795 (1  $\mu\text{M}$ ) for 1 h  
402 before treatment with 2'3'cGAMP (10  $\mu\text{g}/\text{mL}$ ). 6 h later RNA was extracted and qRT-PCR carried  
403 out for the indicated genes. (E) HD11 cells were treated with 2'3'cGAMP (2.5  $\mu\text{g}/\text{mL}$ ) 6 h later  
404 phagocytosis was monitored by FITC-conjugated, zymosan coated bead uptake. \*:  $p < 0.05$ , \*\*:  $p <$   
405  $0.01$ , \*\*\*:  $p < 0.001$ ; \*\*\*\*:  $p < 0.0001$ ; ns: no significant difference

406 **Figure 4. cGAS is essential for intracellular DNA-dependent IFN-I and MHC-II transcription**  
407 **in HD11 cells.** (A) Example of identification of indel in clonally selected HD11 cGAS KO using  
408 NGS sequencing. (B, C) WT and cGAS KO HD11 cells were transfected with HT-DNA, CT-DNA  
409 (2  $\mu\text{g}/\text{mL}$ ) or Poly(I:C) (1  $\mu\text{g}/\text{mL}$ ) for 6 h and transcription of the indicated genes measured by qRT-  
410 PCR. (D) cGAS KO HD11 cells were primed with IFN $\alpha$  for 6h, transfected with HT-DNA, CT-  
411 DNA, or Poly(I:C) and transcription of IFNB and ISG12.2 measured by qRT-PCR 6 h later (E) WT  
412 or cGAS KO cells were treated with 2'3'cGAMP (10  $\mu\text{g}/\text{mL}$ ) and transcription of IFNB measured by  
413 qRT-PCR 6 h later. \*:  $p < 0.05$ , \*\*:  $p < 0.01$ , \*\*\*:  $p < 0.001$ ; \*\*\*\*:  $p < 0.0001$ ; ns: no significant  
414 difference

415 **Figure 5. STING is essential for intracellular DNA-dependent IFN-I transcription in HD11**  
416 **cells.** (A) Example of identification of indel in clonally selected HD11 STING KO using NGS  
417 sequencing. (B) WT and STING KO HD11 cells were transfected with HT-DNA, CT-DNA (2  
418  $\mu\text{g}/\text{mL}$ ) or Poly(I:C) (1  $\mu\text{g}/\text{mL}$ ) for 6 h and transcription of the indicated genes measured by qRT-  
419 PCR 6 h later. \*:  $p < 0.05$ , \*\*:  $p < 0.01$ , \*\*\*:  $p < 0.001$ ; \*\*\*\*:  $p < 0.0001$ ; ns: no significant  
420 difference

421 **Figure 6. Fowlpox triggers a cGAS / STING dependent DNA sensing pathway in HD11 cells.**  
422 (A) HD11 cells were infected with FWPV strain FP9 at a multiplicity of infection of three. 24 h later  
423 RNA was extracted and qRT-PCR carried out for the indicated genes. (B, C) HD11 WT, cGAS or  
424 STING KO cells were infected with FP9, FPV012 or FPV184 at a multiplicity of infection of three.  
425 24 h later RNA was extracted and qRT-PCR carried out for the indicated genes. \*:  $p < 0.05$ , \*\*:  $p <$   
426  $0.01$ , \*\*\*:  $p < 0.001$ ; \*\*\*\*:  $p < 0.0001$ ; ns: no significant difference

427 **Supplementary Figure 1. Effect of IFN $\alpha$  priming on expression levels of STING and IRF7 in**  
428 **BMDM and HD11.** BMDM or HD11 cells were treated with IFN $\alpha$  for 6 h and transcription of  
429 STING and IRF7 measured by qRT-PCR 6 h later.

430 **Supplementary Figure 2. cGAS is essential for intracellular DNA-dependent IFN-I**  
431 **transcription in HD11 cells.** WT or three individual cGAS knockout clones with different indels  
432 were stimulated with HT-DNA (2  $\mu\text{g}/\text{mL}$ ) and IFN $\beta$  transcription measured by qRT-PCR 6 h later.

433 **Supplementary Figure 3. STING is essential for intracellular DNA-dependent IFN-I**  
434 **transcription in HD11 cells.** (A) WT or three individual cGAS knockout clones with different indels  
435 were stimulated with HT-DNA (2  $\mu\text{g}/\text{mL}$ ) and IFN $\beta$  transcription measured by qRT-PCR 6 h later.

436

437

438

439

440

441

442

443

444

445

446

447

448

449 **Tables**

450 **Table 1.** CRISPR/Cas9 guide RNAs

451

| Gene  | Target           | Guide  | Sequence             |
|-------|------------------|--------|----------------------|
| cGAS  | Catalytic Domain | sgRNA1 | CTCTTTCTCGCATATCGAGA |
|       |                  | sgRNA2 | ACGGCCTCAACATAGAATGC |
|       |                  | sgRNA3 | TTTGGTTCAGATATCTGCAA |
|       |                  | sgRNA4 | ACTGTGAAAAGGAAAAAGCG |
| STING | Coding Region    | sgRNA1 | GTAGCCGATGTAGTAGGAC  |
|       |                  | sgRNA2 | GTGCAGACGCTGCGGATGA  |

460

461

462 **Table 2.** Illumina sequencing primers

| Gene  | Guide             | Forward primer           | Reverse primer            |
|-------|-------------------|--------------------------|---------------------------|
| cGAS  | sgRNA1            | CTATTTAAATCTCGTGCTCACCCC | CTCACTCCCTGTTCTAAATAACG   |
|       | sgRNA2/<br>sgRNA4 | GTGTTTCTTCTGTTATGGAAAAGG | GCTTGGCCACTAAGTAAATTGG    |
|       | sgRNA3            | CCACTTGAATGCACATCAGTCTGG | CCAGTGTCGTCACTCTCATCTAGCT |
| STING | sgRNA1            | TCCACAGGGCCACCACT        | TGCAGGAGCCGTTTCCATCT      |
|       | sgRNA2            | CAACCAGGAGCAGCCCTGCT     | CTGGAGTGCAGGTGGAAGATCTCC  |

471

472

473

474

475 **Table 3.** qRT-PCR primer sequences

| Gene    | Forward primer          | Reverse primer         |
|---------|-------------------------|------------------------|
| HPRT    | TGGTGGGGATGACCTCTCAA    | GGCCGATATCCCACACTTCG   |
| IFNB    | TCCTGCAACCATCTTCGTCA    | CACGTCTTGTTGTGGGCAAG   |
| ISG12-2 | TGACCAGAACGTCCACAAAGCCG | ACCTGCTCCTGGACCGATGCTT |
| BLB1    | GTGAGCCGCAAGCTGAATAC    | ACCGTGAAGGACTCCACAAC   |
| BLB2    | ATGAATGAAGTGGACAGGGTCT  | TTCAGGAACCACTTCACCTCG  |
| CD40    | AGCCATGCCACTTCTGGAC     | ATCGGAAGTGTTTCGTCCTT   |
| CD86    | TATGCACGTGGACAAGGGAC    | AACCTCCGCTGGAAGAACAG   |
| STING   | AGCTCCCTACCTCCATCAGGA   | TCTGGAAAACCCAGCATCTC   |
| IRF7    | TGCCTCAGGCGTCCCAATG     | TGTGTGCCACAGGGTTGGC    |
| FPV094  | TATAATGAATGGCGCTGTGT    | GTTTTGCTATCTTGGCTGT    |
| FPV168  | ACCTCAAACAACCTCATC      | GTAAATACTTGTGACTGCTG   |

476

477

### 478 **Conflict of Interest**

479 The authors declare that the research was conducted in the absence of any commercial or financial  
480 relationships that could be construed as a potential conflict of interest.

### 481 **Author Contributions**

482 BF and CB provided the funding and supervised the work. MO, DR, RG, VG and EK performed the  
483 experiments and statistical analysis. SG and MS generated the mutant fowlpox viruses. BF, CB, RG  
484 designed the study and wrote the manuscript.

### 485 **Funding**

486 This work was funded by BBSRC grants RG94719 (BF and CEB), BB/E009956/1, BB/G018545/1,  
487 BB/H005323/1 & BB/K002465/1 (MAS)



## 488 **Acknowledgments**

489 This manuscript has been released as a Pre-print at BioRxiv. We thank the experimental facility PFIE  
490 (Plateforme d'Infectiologie Expérimentale, Centre INRAE Val de Loire, Nouzilly, France) for  
491 providing the animals used for the isolation of primary macrophages.

## 492 **References**

- 493 Ablasser, A., Hertrich, C., Wassermann, R., and Hornung, V. (2013a). Nucleic acid driven sterile  
494 inflammation. *Clin. Immunol.* *147*, 207–215.
- 495 Ablasser, A., Goldeck, M., Cavlar, T., Deimling, T., Witte, G., Röhl, I., Hopfner, K.-P., Ludwig, J.,  
496 and Hornung, V. (2013b). cGAS produces a 2'-5'-linked cyclic dinucleotide second messenger that  
497 activates STING. *Nature* *498*, 380–384.
- 498 Ablasser, A., Schmid-Burgk, J.L., Hemmerling, I., Horvath, G.L., Schmidt, T., Latz, E., and  
499 Hornung, V. (2013c). Cell intrinsic immunity spreads to bystander cells via the intercellular transfer  
500 of cGAMP. *Nature* *503*, 530–534.
- 501 Beug, H., von Kirchbach, A., Döderlein, G., Conscience, J.F., and Graf, T. (1979). Chicken  
502 hematopoietic cells transformed by seven strains of defective avian leukemia viruses display three  
503 distinct phenotypes of differentiation. *Cell* *18*, 375–390.
- 504 Bryant, C.E., Orr, S., Ferguson, B., Symmons, M.F., Boyle, J.P., and Monie, T.P. (2015).  
505 International union of basic and clinical pharmacology. XCVI. Pattern recognition receptors in health  
506 and disease. *Pharmacol. Rev.* *67*.
- 507 Cheng, Y., Zhu, W., Ding, C., Niu, Q., Wang, H., Yan, Y., and Sun, J. (2019). IRF7 Is Involved in  
508 Both STING and MAVS Mediating IFN- $\beta$  Signaling in IRF3-Lacking Chickens. *J. Immunol.* *203*,  
509 1930–1942.
- 510 Crow, Y.J., and Rehwinkel, J. (2009). Aicardi-Goutieres syndrome and related phenotypes: linking  
511 nucleic acid metabolism with autoimmunity. *Hum. Mol. Genet.* *18*, R130-6.
- 512 Desmet, C.J., and Ishii, K.J. (2012). Nucleic acid sensing at the interface between innate and adaptive  
513 immunity in vaccination. *Nat. Rev. Immunol.* *12*, 479–491.
- 514 Gaidt, M.M., Ebert, T.S., Chauhan, D., Ramshorn, K., Pinci, F., Zuber, S., O'Duill, F., Schmid-  
515 Burgk, J.L., Hoss, F., Buhmann, R., et al. (2017). The DNA Inflammasome in Human Myeloid Cells  
516 Is Initiated by a STING-Cell Death Program Upstream of NLRP3. *Cell* *171*, 1110-1124.e18.
- 517 Gao, L., Li, K., Zhang, Y., Liu, Y., Liu, C., Zhang, Y., Gao, Y., Qi, X., Cui, H., Wang, Y., et al.  
518 (2018). Inhibition of DNA-Sensing Pathway by Marek's Disease Virus VP23 Protein through  
519 Suppression of Interferon Regulatory Factor 7 Activation. *J. Virol.* *93*.
- 520 Garrido, D., Alber, A., Kut, E., Chanteloup, N.K., Lion, A., Trotereau, A., Dupont, J., Tedin, K.,  
521 Kaspers, B., Vervelde, L., et al. (2018). The role of type I interferons (IFNs) in the regulation of  
522 chicken macrophage inflammatory response to bacterial challenge. *Dev. Comp. Immunol.* *86*, 156–  
523 170.

- 524 Giotis, E.S., and Skinner, M.A. (2019). Spotlight on avian pathology: fowlpox virus. *Avian Pathol.*  
525 48, 87–90.
- 526 Giotis, E.S., Robey, R.C., Skinner, N.G., Tomlinson, C.D., Goodbourn, S., and Skinner, M.A.  
527 (2016). Chicken interferome: avian interferon-stimulated genes identified by microarray and RNA-  
528 seq of primary chick embryo fibroblasts treated with a chicken type I interferon (IFN- $\alpha$ ). *Vet. Res.*  
529 47, 75.
- 530 Glück, S., Guey, B., Gulen, M.F., Wolter, K., Kang, T.W., Schmacke, N.A., Bridgeman, A.,  
531 Rehwinkel, J., Zender, L., and Ablasser, A. (2017). Innate immune sensing of cytosolic chromatin  
532 fragments through cGAS promotes senescence. *Nat. Cell Biol.* 19, 1061–1070.
- 533 Grant, C.E., Vasa, M.Z., and Deeley, R.G. (1995). cIRF-3, a new member of the interferon regulatory  
534 factor (IRF) family that is rapidly and transiently induced by dsRNA. *Nucleic Acids Res.* 23, 2137–  
535 2146.
- 536 Gulen, M.F., Koch, U., Haag, S.M., Schuler, F., Apetoh, L., Villunger, A., Radtke, F., and Ablasser,  
537 A. (2017). Signalling strength determines proapoptotic functions of STING. *Nat. Commun.* 8.
- 538 Kaiser, P. (2010). Advances in avian immunology-prospects for disease control: A review. *Avian*  
539 *Pathol.* 39, 309–324.
- 540 Laidlaw, S.M., Robey, R., Davies, M., Giotis, E.S., Ross, C., Buttigieg, K., Goodbourn, S., and  
541 Skinner, M.A. (2013). Genetic Screen of a Mutant Poxvirus Library Identifies an Ankyrin Repeat  
542 Protein Involved in Blocking Induction of Avian Type I Interferon. *J. Virol.* 87, 5041–5052.
- 543 Li, T., and Chen, Z.J. (2018). The cGAS–cGAMP–STING pathway connects DNA damage to  
544 inflammation, senescence, and cancer. *J. Exp. Med.* 215, 1287–1299.
- 545 Li, K., Liu, Y., Xu, Z., Zhang, Y., Luo, D., Gao, Y., Qian, Y., Bao, C., Liu, C., Zhang, Y., et al.  
546 (2019). Avian oncogenic herpesvirus antagonizes the cGAS-STING DNA-sensing pathway to  
547 mediate immune evasion. *PLoS Pathog.* 15.
- 548 Li, X.-D., Wu, J., Gao, D., Wang, H., Sun, L., and Chen, Z.J. (2013). Pivotal roles of cGAS-cGAMP  
549 signaling in antiviral defense and immune adjuvant effects. *Science* 341, 1390–1394.
- 550 Loré, K., Betts, M.R., Brenchley, J.M., Kuruppu, J., Khojasteh, S., Perfetto, S., Roederer, M., Seder,  
551 R.A., and Koup, R.A. (2003). Toll-Like Receptor Ligands Modulate Dendritic Cells to Augment  
552 Cytomegalovirus- and HIV-1-Specific T Cell Responses. *J. Immunol.* 171, 4320–4328.
- 553 Lousberg, E.L., Fraser, C.K., Tovey, M.G., Diener, K.R., and Hayball, J.D. (2010). Type I  
554 interferons mediate the innate cytokine response to recombinant fowlpox virus but not the induction  
555 of plasmacytoid dendritic cell-dependent adaptive immunity. *J. Virol.* 84, 6549–6563.
- 556 Ma, F., Li, B., Yu, Y., Iyer, S.S., Sun, M., and Cheng, G. (2015). Positive feedback regulation of  
557 type I interferon by the interferon-stimulated gene STING. *EMBO Rep.* 16, 202–212.
- 558 Mansur, D.S., Smith, G.L., and Ferguson, B.J. (2014). Intracellular sensing of viral DNA by the  
559 innate immune system. *Microbes Infect.* 16, 1002–1012.

- 560 Mullard, A. (2017). Can innate immune system targets turn up the heat on “cold” tumours? *Nat. Rev.*  
561 *Drug Discov.* 2017 171.
- 562 Schadt, L., Sparano, C., Schweiger, N.A., Silina, K., Cecconi, V., Lucchiari, G., Yagita, H.,  
563 Guggisberg, E., Saba, S., Nascakova, Z., et al. (2019). Cancer-Cell-Intrinsic cGAS Expression  
564 Mediates Tumor Immunogenicity. *Cell Rep.* 29, 1236-1248.e7.
- 565 Schmidt, T., Schmid-Burgk, J.L., Ebert, T.S., Gaidt, M.M., and Hornung, V. (2016). Designer  
566 nuclease-mediated generation of knockout THP1 cells. In *Methods in Molecular Biology*, (Humana  
567 Press Inc.), pp. 261–272.
- 568 Schulz, O., Diebold, S.S., Chen, M., Näslund, T.I., Nolte, M.A., Alexopoulou, L., Azuma, Y.-T.,  
569 Flavell, R.A., Liljeström, P., and Reis e Sousa, C. (2005). Toll-like receptor 3 promotes cross-  
570 priming to virus-infected cells. *Nature* 433, 887–892.
- 571 Schwarz, H., Harlin, O., Ohnemus, A., Kaspers, B., and Staeheli, P. (2004). Synthesis of IFN- $\beta$  by  
572 Virus-Infected Chicken Embryo Cells Demonstrated with Specific Antisera and a New Bioassay. *J.*  
573 *Interf. Cytokine Res.* 24, 179–184.
- 574 Smith, G.L., Benfield, C.T.O., Maluquer de Motes, C., Mazzon, M., Ember, S.W.J., Ferguson, B.J.,  
575 and Sumner, R.P. (2013). Vaccinia virus immune evasion: mechanisms, virulence and  
576 immunogenicity. *J. Gen. Virol.* 94, 2367–2392.
- 577 Stetson, D.B., and Medzhitov, R. (2006). Recognition of cytosolic DNA activates an IRF3-dependent  
578 innate immune response. *Immunity* 24, 93–103.
- 579 Sze, A., Belgnaoui, S.M., Olganier, D., Lin, R., Hiscott, J., and Van Grevenynghe, J. (2013). Host  
580 restriction factor SAMHD1 limits human T cell leukemia virus type 1 infection of monocytes via  
581 STING-mediated apoptosis. *Cell Host Microbe* 14, 422–434.
- 582 Tanaka, Y., and Chen, Z.J. (2012). STING specifies IRF3 phosphorylation by TBK1 in the cytosolic  
583 DNA signaling pathway. *Sci. Signal.* 5, ra20.
- 584 Vitak, N., Hume, D.A., Chappell, K.J., Sester, D.P., and Stacey, K.J. (2016). Induction of interferon  
585 and cell death in response to cytosolic DNA in chicken macrophages. *Dev. Comp. Immunol.* 59,  
586 145–152.
- 587 Wang, J., Ba, G., Han, Y.Q., Ming, S.L., Wang, M. Di, Fu, P.F., Zhao, Q.Q., Zhang, S., Wu, Y.N.,  
588 Yang, G.Y., et al. (2020). Cyclic GMP-AMP synthase is essential for cytosolic double-stranded DNA  
589 and fowl adenovirus serotype 4 triggered innate immune responses in chickens. *Int. J. Biol.*  
590 *Macromol.* 146, 497–507.
- 591 Williams, S.M., Smith, J.A., Garcia, M., Brinson, D., Kiupel, M., and Hofacre, C. (2010). Severe  
592 histiolympocytic and heterophilic bronchopneumonia as a reaction to in ovo fowlpox vaccination in  
593 broiler chicks. *Vet. Pathol.* 47, 177–180.
- 594

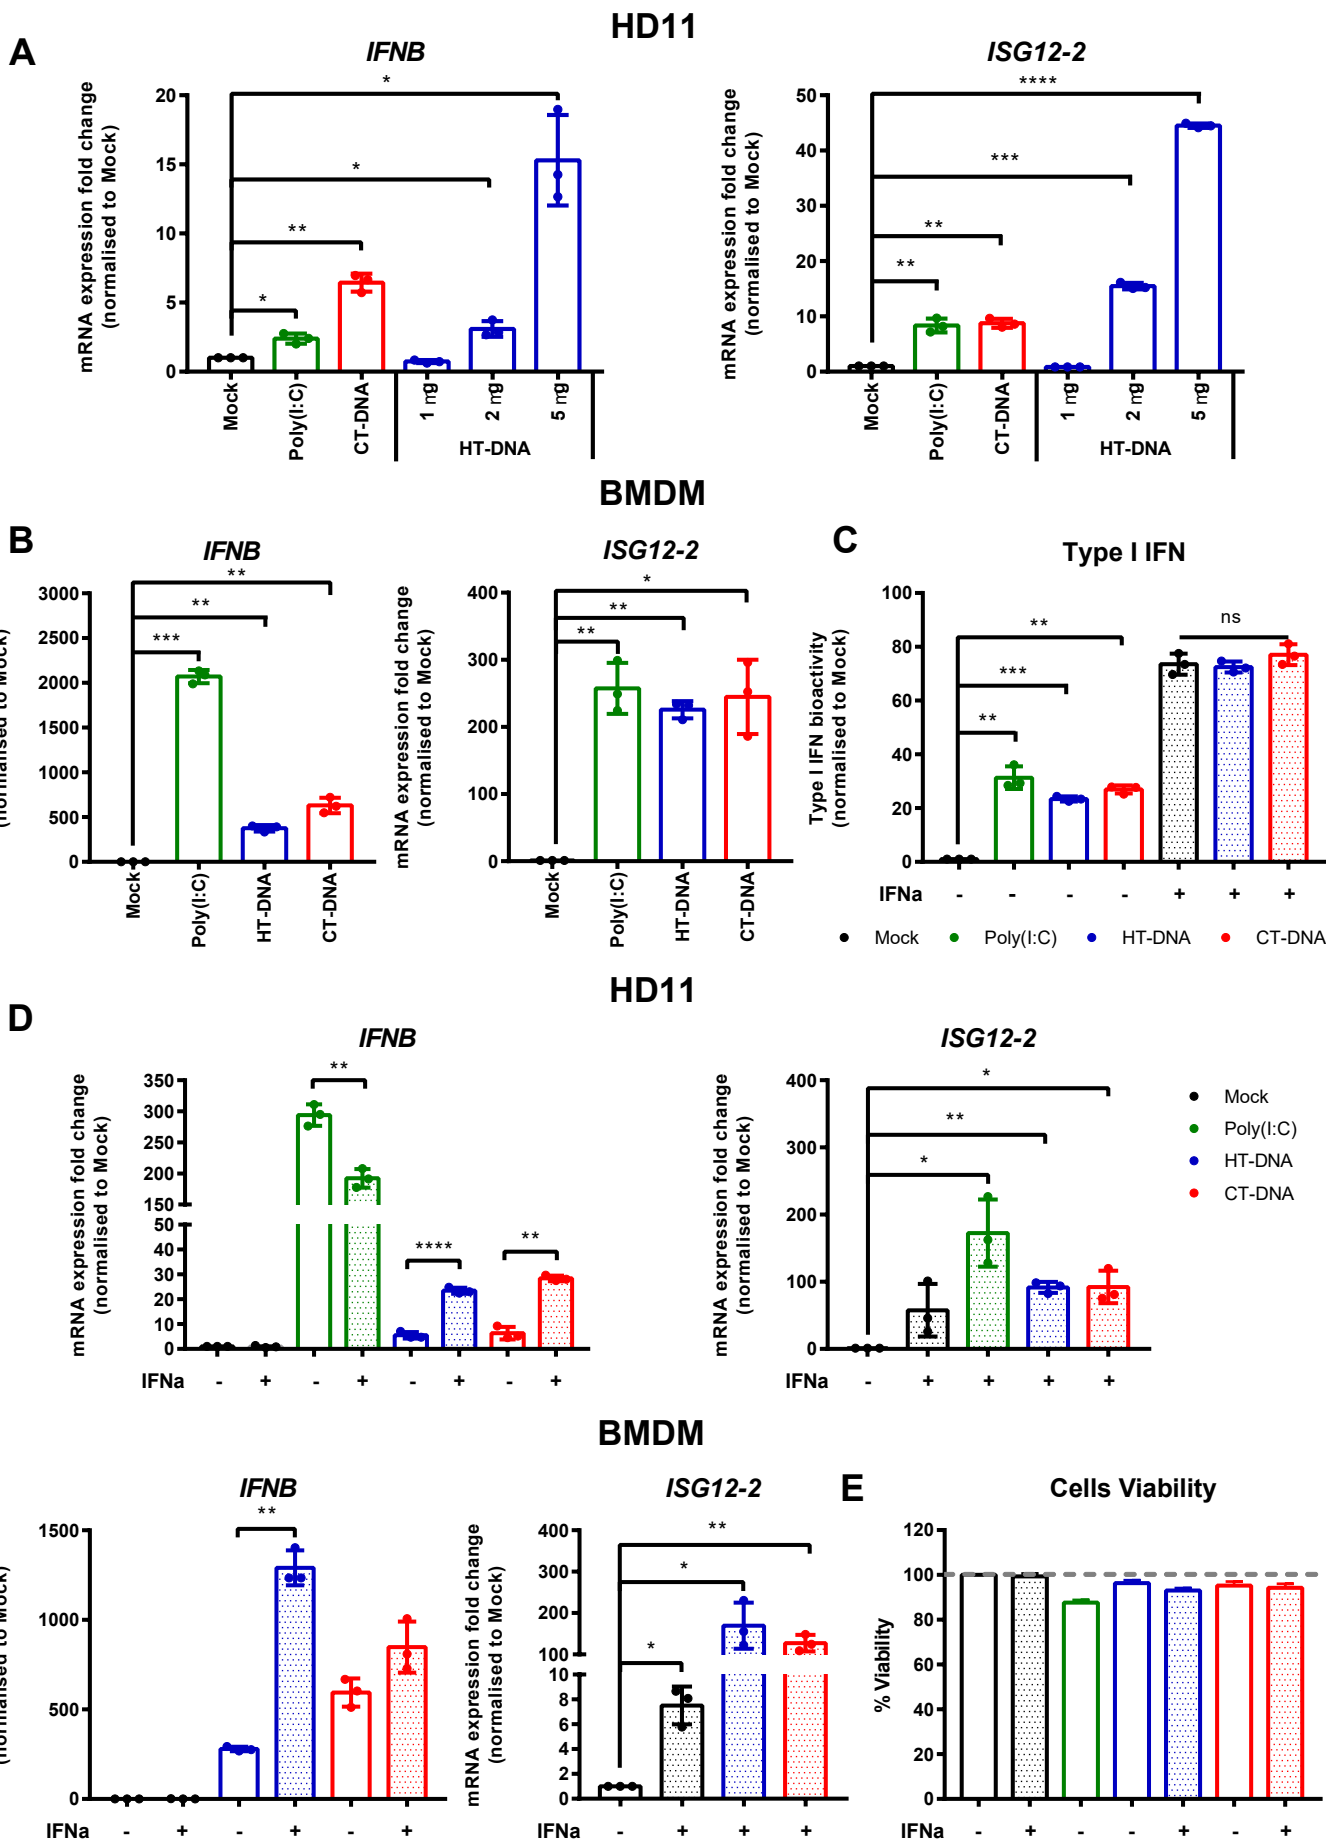

## BMDM

### A

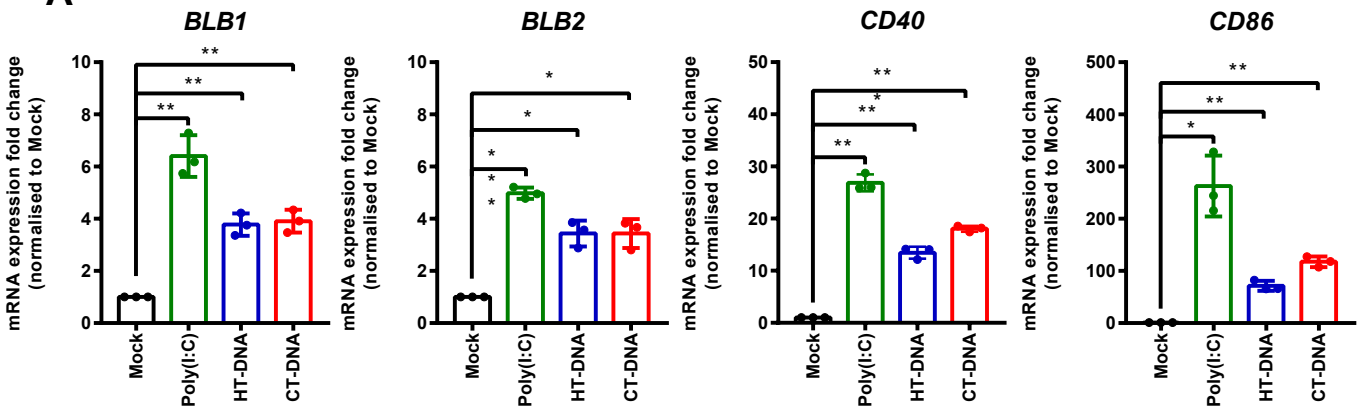

### B

## HD11

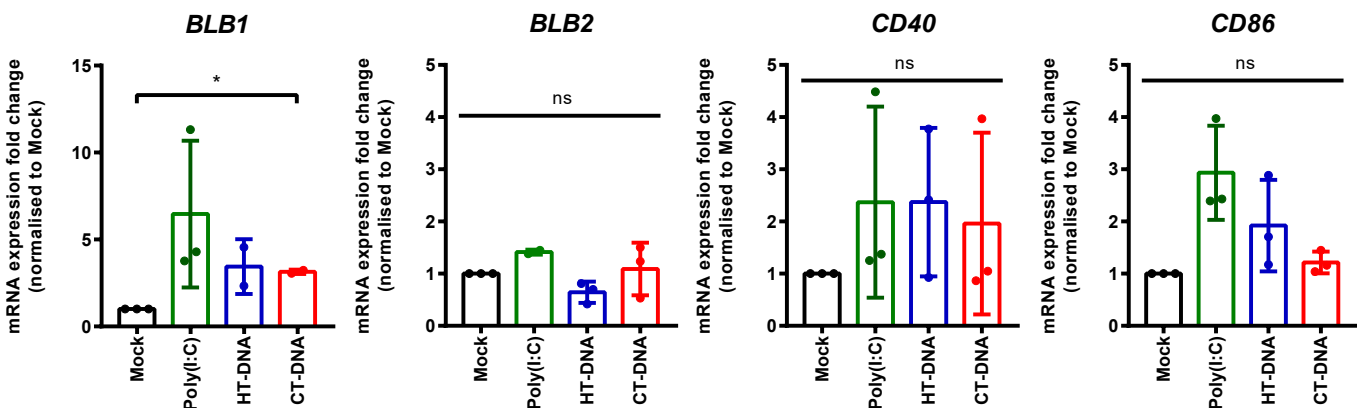

### C

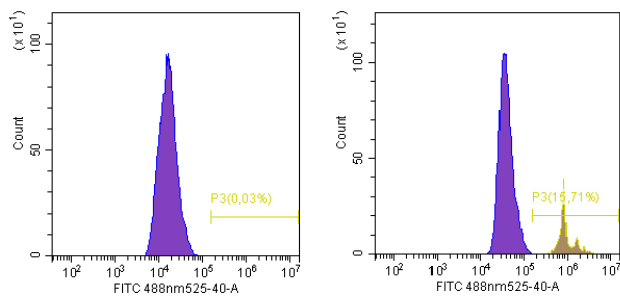

## Beads Intake

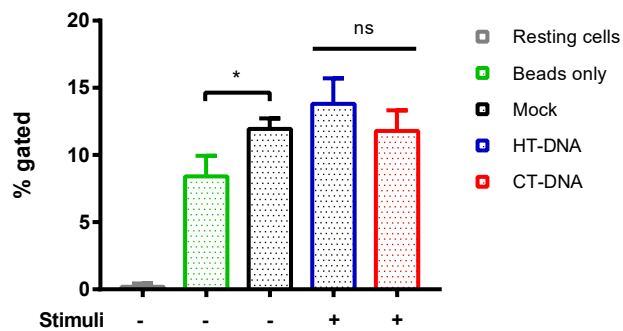



**HD11**

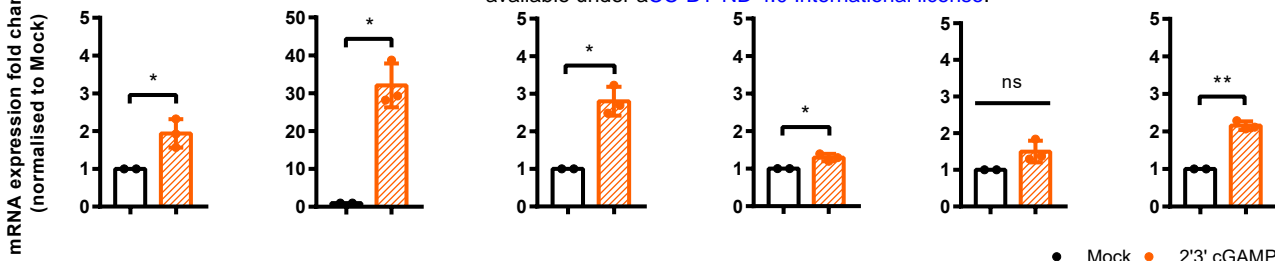

**BMDM**

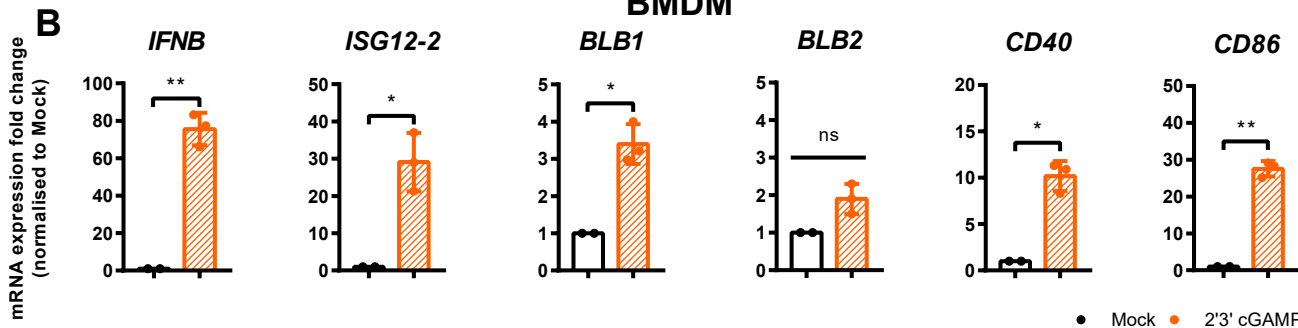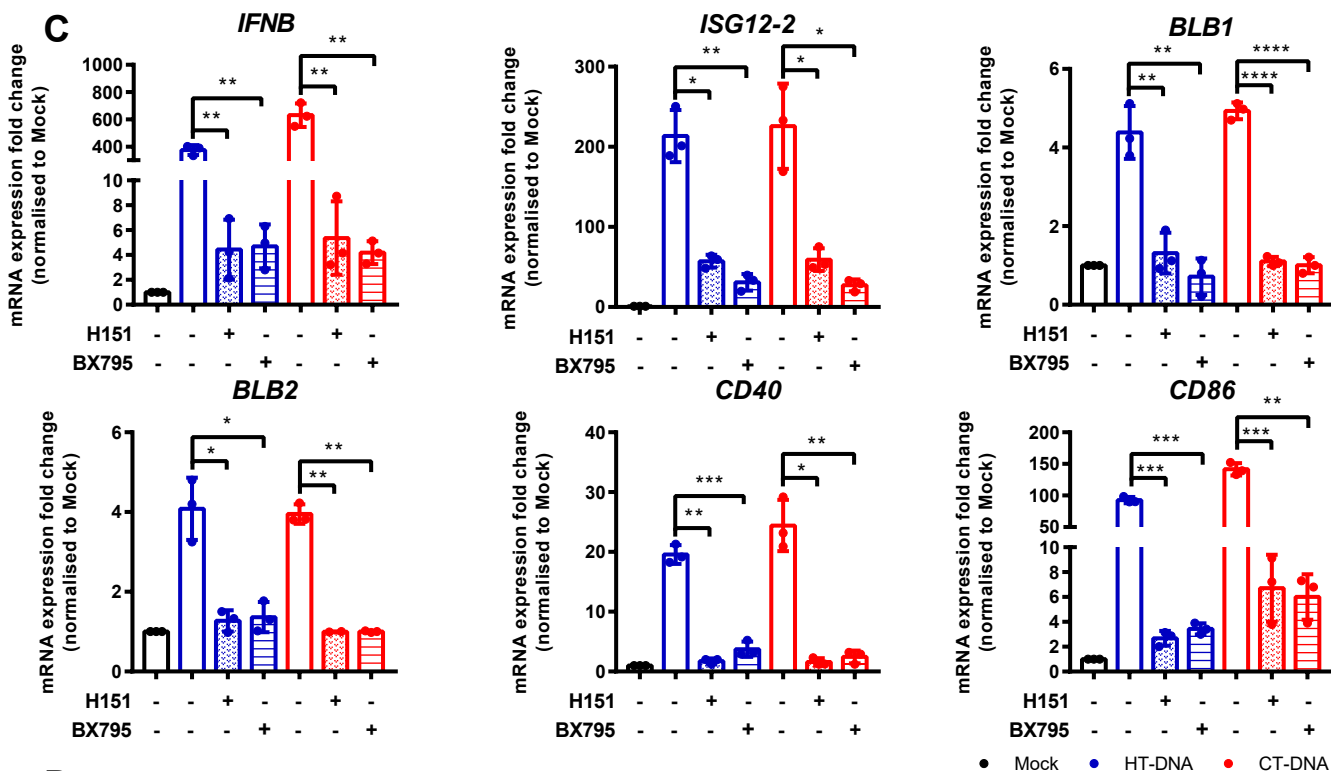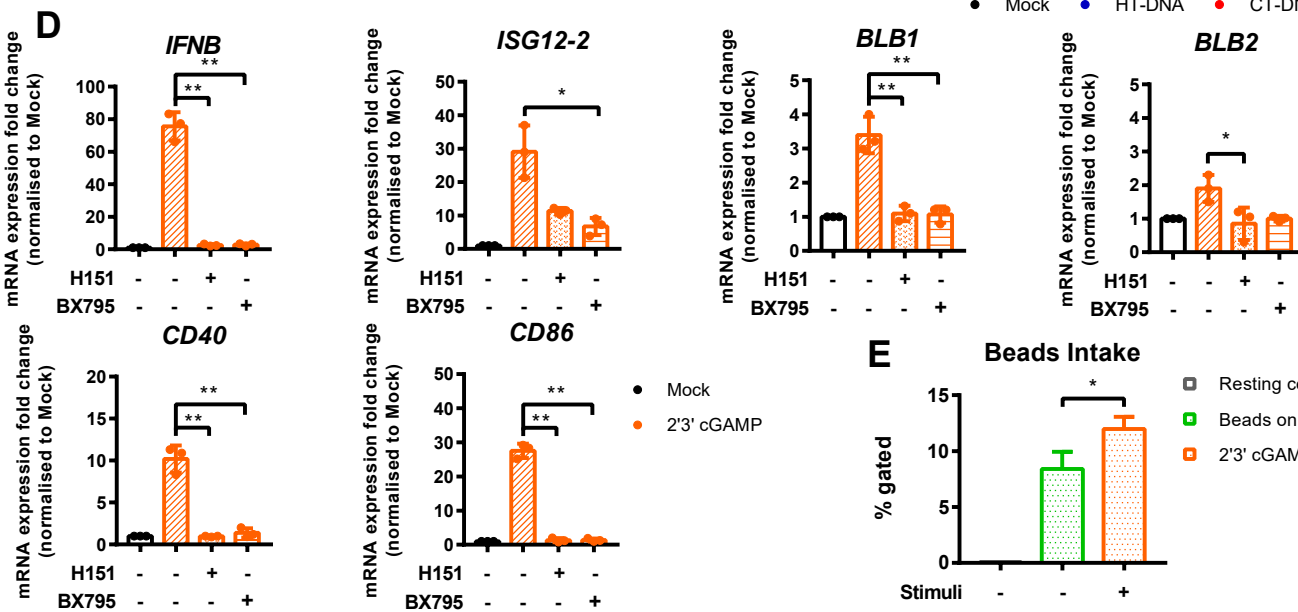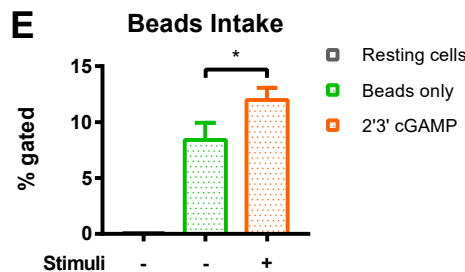

**A**

1 bp deletion

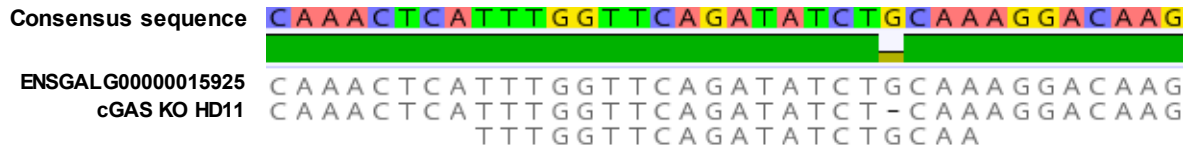**B**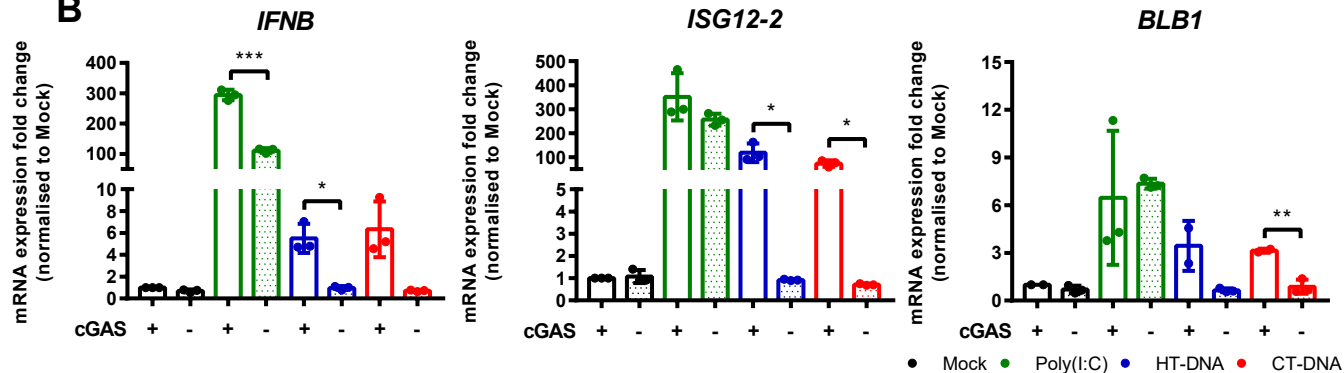**C**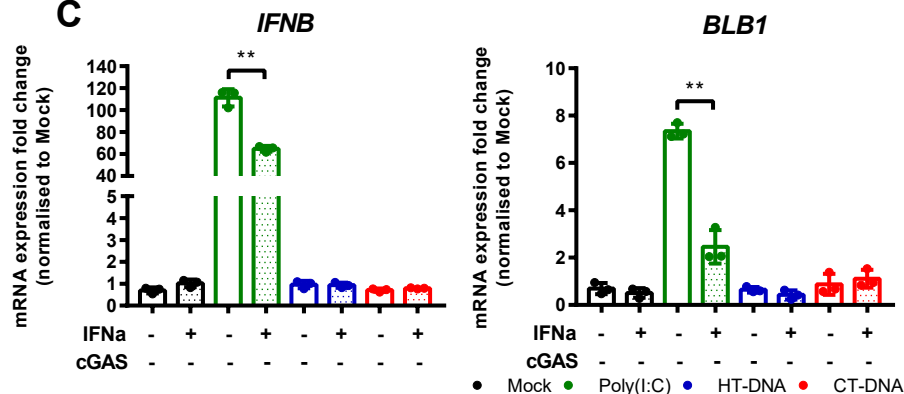**D**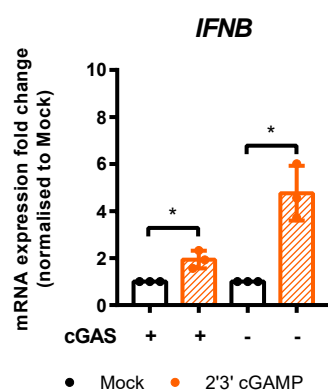

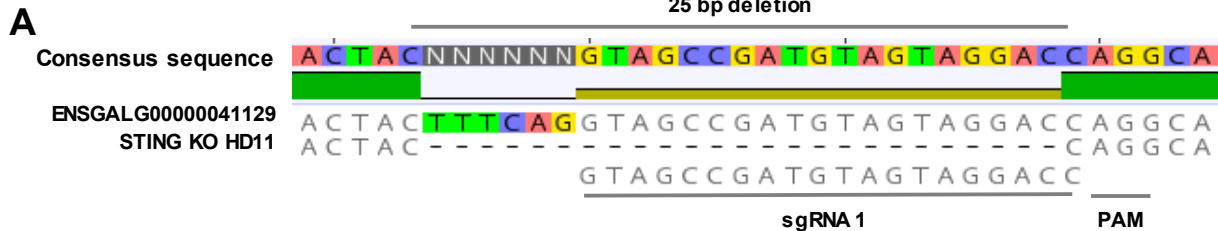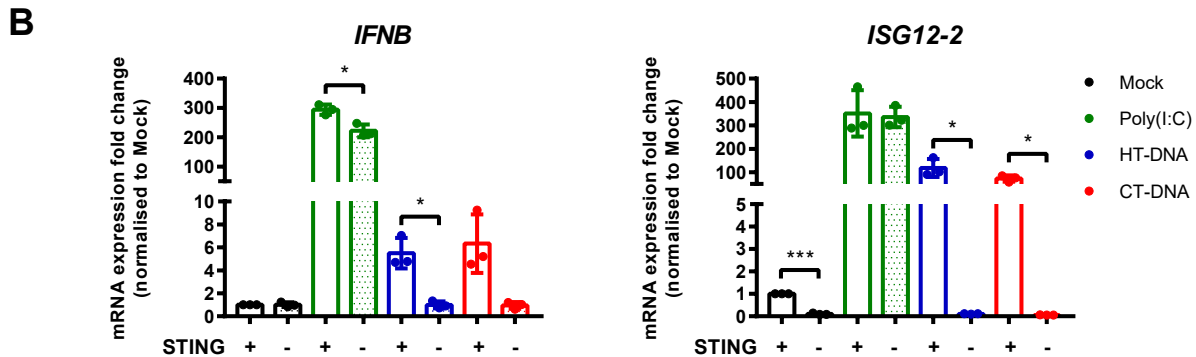

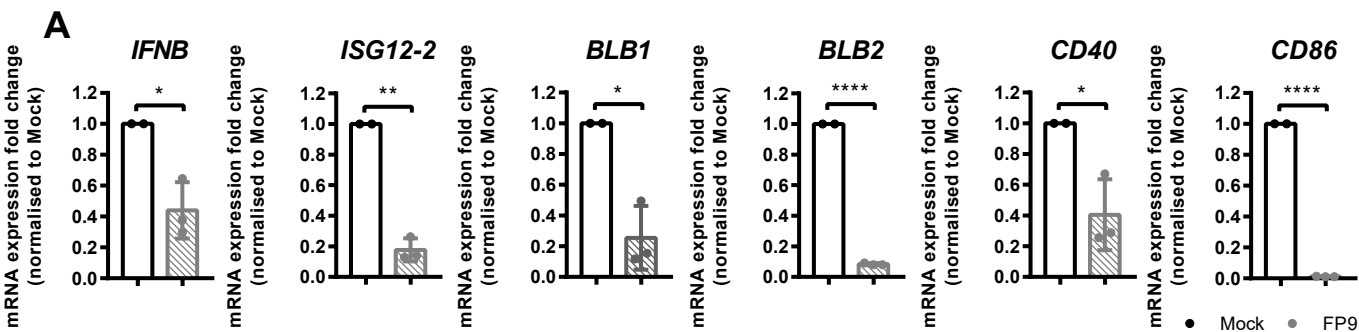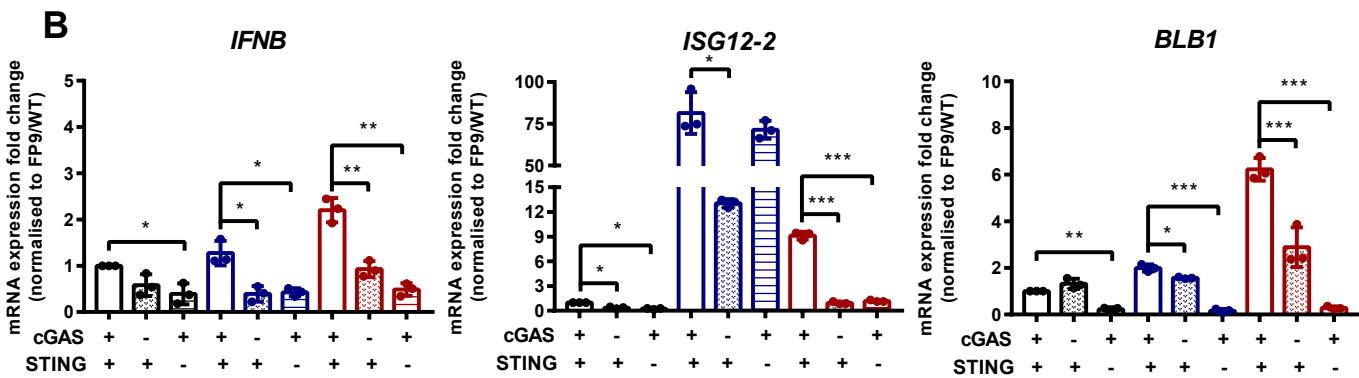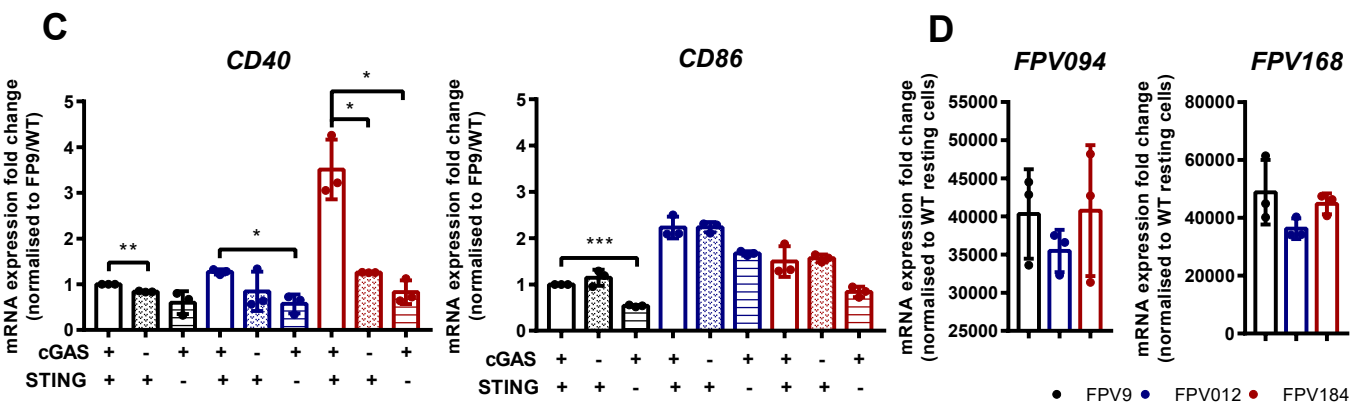

# *IFNB*

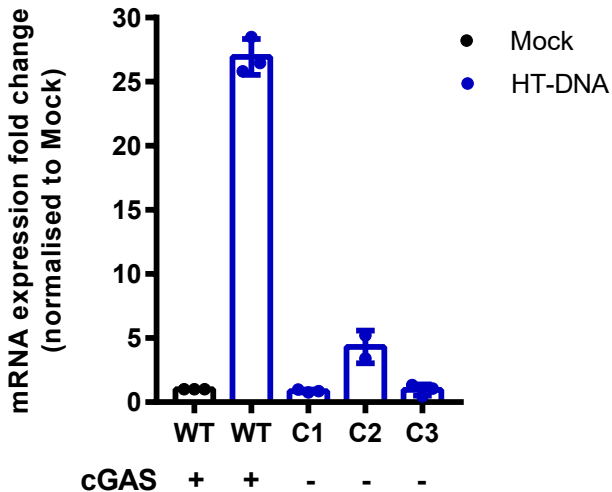



# *IFNB*

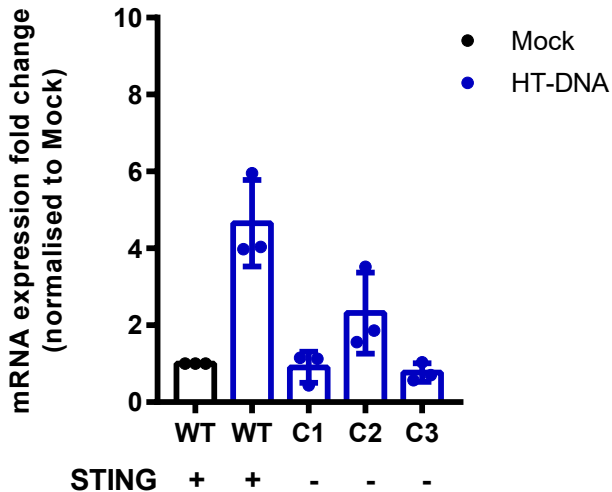

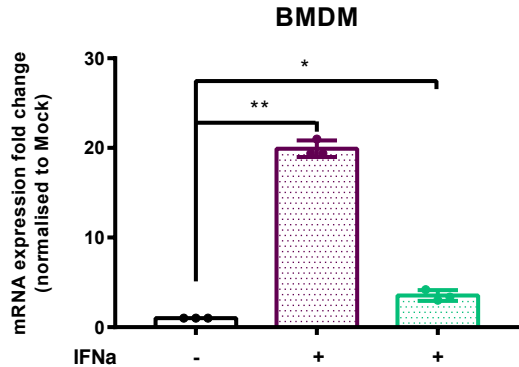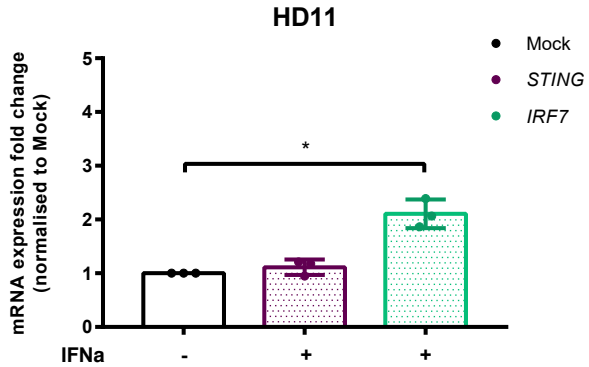

Source: https://www.biorxiv.org/content/10.1101/2020.10.01.321422v1.full.pdf
